# Supplementary material
Source: PubMed Central journal article supplement (PMC5777254)
Supplement: supp_M117.812289_supplemental_7979_M117._12289.pdf [file supp_M117.812289_supplemental_7979_M117._12289.pdf]

## SUPPLEMENTAL MATERIALS

### Supplemental Methods:

#### *Measurement of the contents of IL-1 $\beta$ , IL-6 and TNF- $\alpha$ in serum and supernatant*

The serum was collected from sham or CLP (cecal ligation and puncture) mice with or without JTV-519 treatment (*in vivo*) under deep anesthesia with pentobarbital sodium (50 mg/kg, i.p). Briefly, the whole blood (~1 ml) was collected from mouse heart under thoracotomy, stood at 4 °C overnight to allow blood coagulation and centrifuged at 2000 g for 15 min. The serum was collected and stored at -80 °C until use.

The cardiomyocytes isolated from sham or CLP mice were seeded on a 96-well plate at the density of  $2.5 \times 10^4$  cells per well in 200  $\mu$ l HEPES-buffered external solution (in mM: 137 NaCl, 5.4 KCl, 1 CaCl<sub>2</sub>, 1.2MgCl<sub>2</sub>, 1.2 NaH<sub>2</sub>PO<sub>4</sub>, 20 glucose and 20 HEPES, pH 7.4) containing JTV-519 (1  $\mu$ M) or not. The cells were cultured in the incubator (5% CO<sub>2</sub>) at 37 °C for four hours. Thereafter, the cultural solutions from the four groups (Sham, CLP, Sham+JTV-519 and CLP+JTV-519) were centrifuged at 12000g for 15 min at 4 °C. The supernatants were then collected and stored at -80 °C until use.

The contents of IL-1 $\beta$ , IL-6 and TNF- $\alpha$  in serum or supernatants were measured by Milliplex following the manufacturer's instruction (1).

### References:

1. Liu, J., Wang, J., Luo, H., Li, Z., Zhong, T., Tang, J., and Jiang, Y. (2017) Screening cytokine/chemokine profiles in serum and organs from an endotoxic shock mouse model by LiquiChip. *Sci China Life Sci* doi: 10.1007/s11427-016-9016-6. [Epub ahead of print]

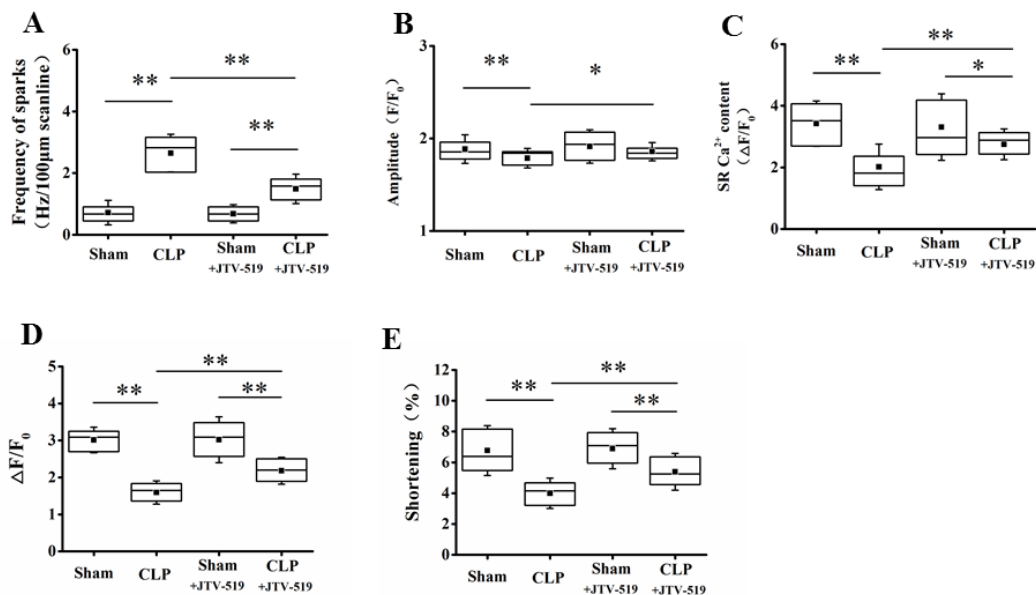

**Supplemental Figure 1. JTV-519 improved Ca<sup>2+</sup> handling and myocyte contraction in**

**septic mouse cardiomyocytes.** A, averages of the frequency of  $\text{Ca}^{2+}$  sparks in cardiomyocytes isolated from Sham, CLP (cecal ligation and puncture), Sham+JTV-519, and CLP+ JTV-519 mice. JTV-519 was applied intraperitoneally (i.v., 0.5mg/kg/h) 2 h before the operation of sham or CLP. B and C, statistics of the amplitude ( $F/F_0$ ) of  $\text{Ca}^{2+}$  sparks (B,  $n=32-51$  in each group) and SR  $\text{Ca}^{2+}$  content (C,  $n=15$  to 26 in each group) in the four groups. D and E, images of AP-elicited  $\text{Ca}^{2+}$  transient and the averages of the amplitude of  $\text{Ca}^{2+}$  transient (D) and maximum cell shortening (E,  $n=42$  to 67 in each group).  $*p<0.05$ ,  $**p<0.01$ .

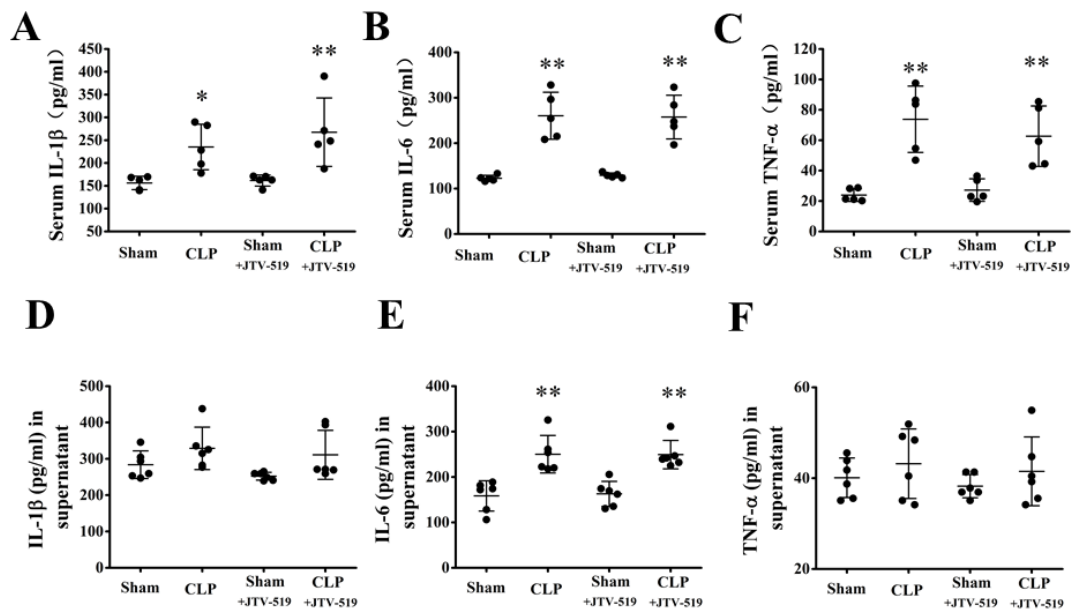

**Supplemental Figure 2. Effects JTV-519 treatment on the productions of IL-1 $\beta$ , IL-6 and TNF- $\alpha$ .** A-C, the concentrations of IL-1 $\beta$  (A), IL-6 (B) and TNF- $\alpha$  (C) ( $n=5$  in each group) in the serum of sham or CLP mice with or without JTV-519 treatment. JTV-519 was applied intraperitoneally (i.v., 0.5mg/kg/h) 2 h before the operation of sham or CLP. D-F, the concentrations of IL-1 $\beta$  (D), IL-6 (E) and TNF- $\alpha$  (F) ( $n=6$  in each group) in the supernatants of cardiomyocytes isolated from sham or CLP mice with or without JTV-519 treatment. JTV-519 (1  $\mu\text{M}$ ) was incubated with cardiomyocytes in HEPES-buffered external solution.  $*p<0.05$ .  $**p<0.01$ . vs control.
